# Supplementary material for: Removal of Phosphorus and Cadmium from Wastewaters by Periphytic Biofilm
Source: MDPI journal article supplement (doi:10.3390/w15183314), 2023-09-20
Supplement: s1 [file s1]

*Supplemental Information*

# Removal of Phosphorus and Cadmium from Wastewaters by Periphytic Biofilm

Jin Zhang <sup>1,2</sup>, Yawei Liu <sup>1,2</sup>, Jiajia Liu <sup>3</sup>, Yu Shen <sup>1,2</sup>, Hui Huang <sup>1,2</sup>, Yongli Zhu <sup>1,2</sup>, Jiangang Han <sup>1,2,\*</sup>  
and Haiying Lu <sup>1,2,\*</sup>

<sup>1</sup> Co-Innovation Center for Sustainable Forestry in Southern China, College of Biology and the Environment, Nanjing Forestry University, Nanjing 210037, China; jinzhang@njfu.edu.cn (J.Z.); ywliu@njfu.edu.cn (Y.L.); shenyu@njfu.edu.cn (Y.S.); huanghui@njfu.edu.cn (H.H.); yonglizhu@njfu.edu.cn (Y.Z.)

<sup>2</sup> National Positioning Observation Station of Hung-tse Lake Wetland Ecosystem in Jiangsu Province, Nanjing 210037, China

<sup>3</sup> Environmental Engineering College, Nanjing Polytechnic Institute, Nanjing 210044, China

\* Correspondence: jianganghan@njfu.edu.cn (J.H.); luhaiying@njfu.edu.cn (H.L.)

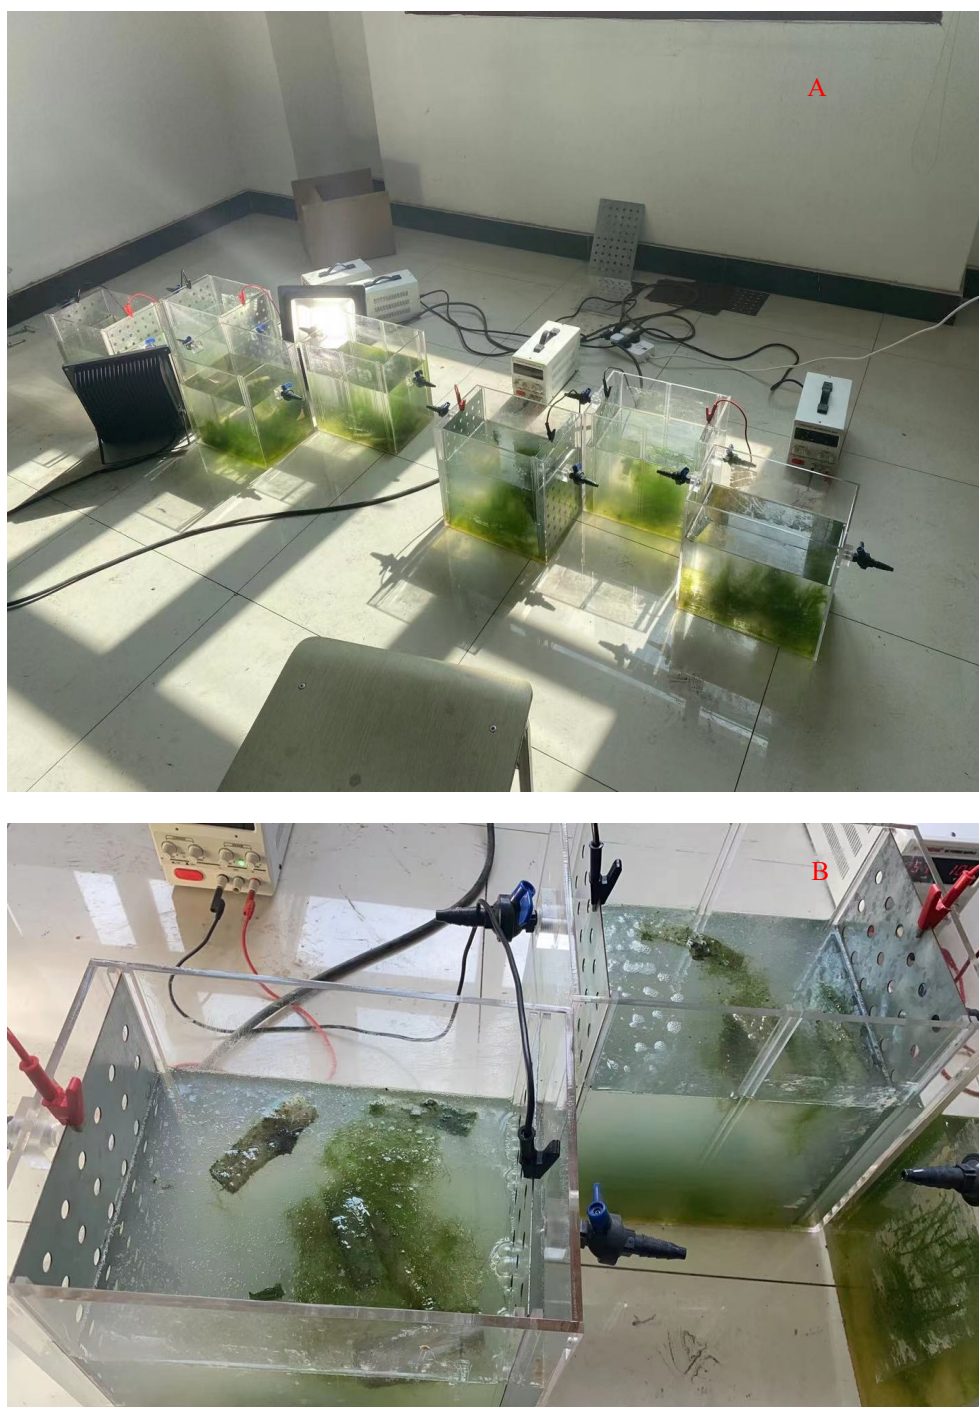

**Figure S1.** Experimental device in the experiment (Part). Note, one group for the electricity addition device for the periphyton (A); and the detailed device description image (B).

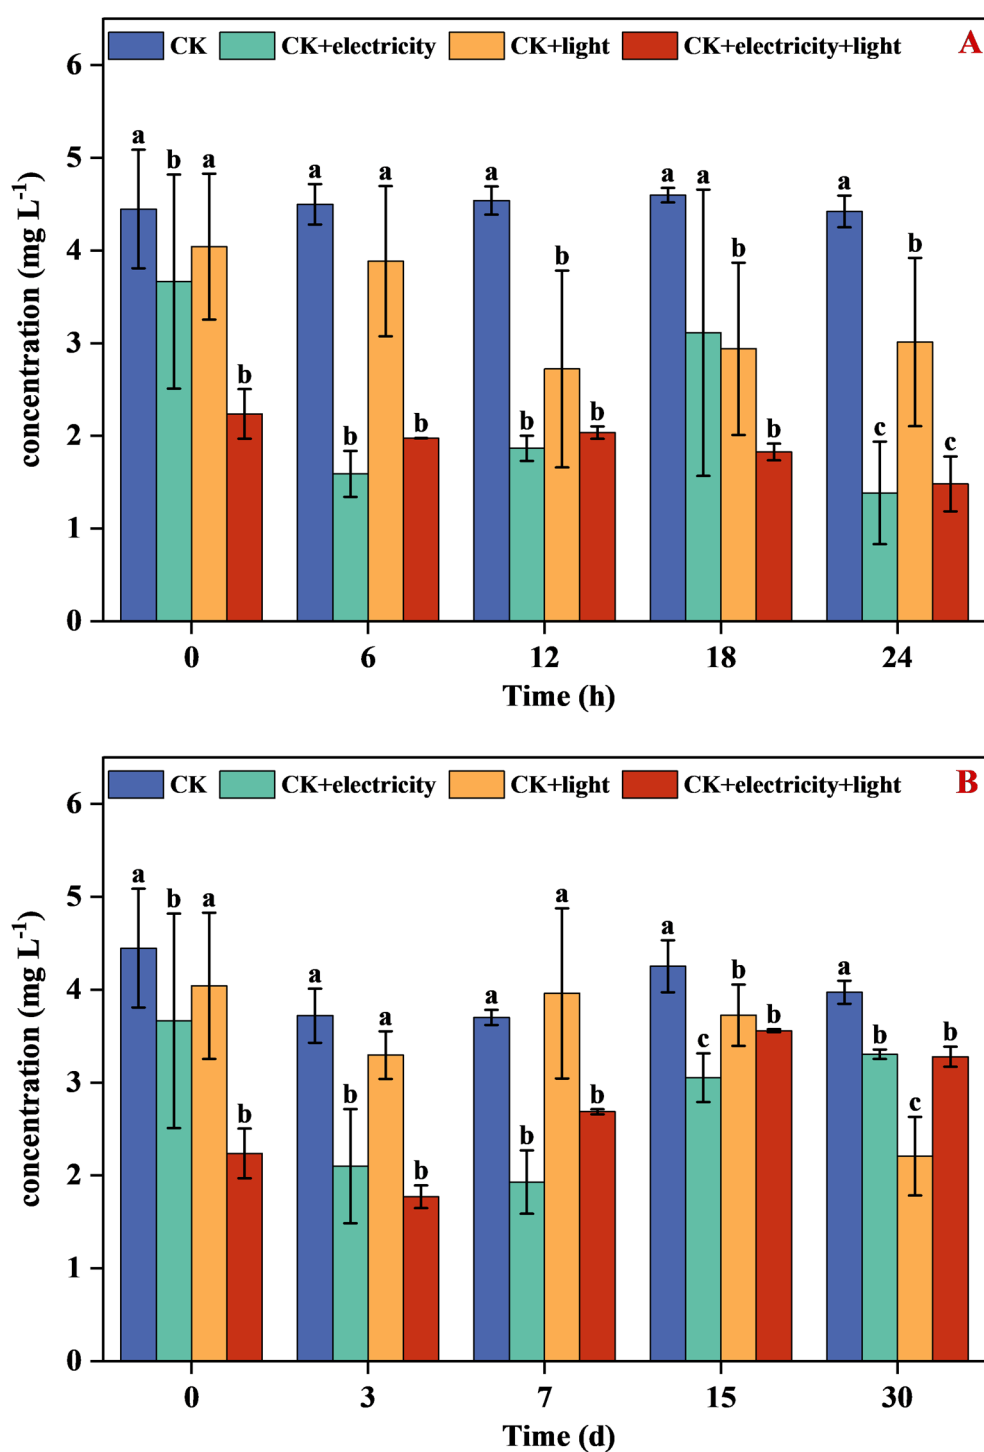

**Figure S2.** Concentration of  $\text{NH}_4^+\text{-N}$  in solution under different treatments with (A) daily change and (B) monthly change in periphyton. Note, Different letters indicate significant differences between treatments ( $p < 0.05$ ).
